# Supplementary material for: Identification of Red Pigments Produced by Cheese-Ripening Bacterial Strains of Glutamicibacter arilaitensis Using HPLC
Source: MDPI journal article supplement (doi:10.3390/dairy2030031), 2021-07-28
Supplement: s1 [file s1]

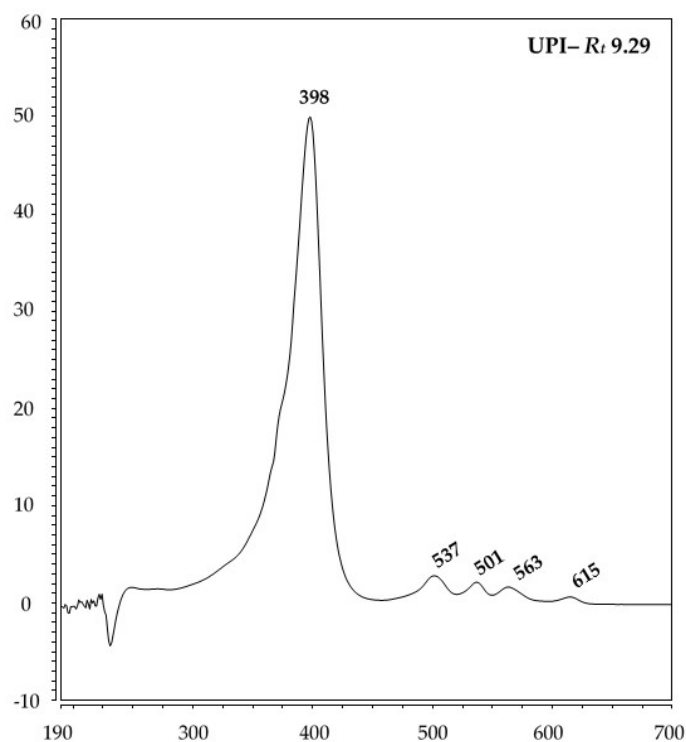

**Figure S1.** UV-vis spectra of authentic uroporphyrin I (UPI).

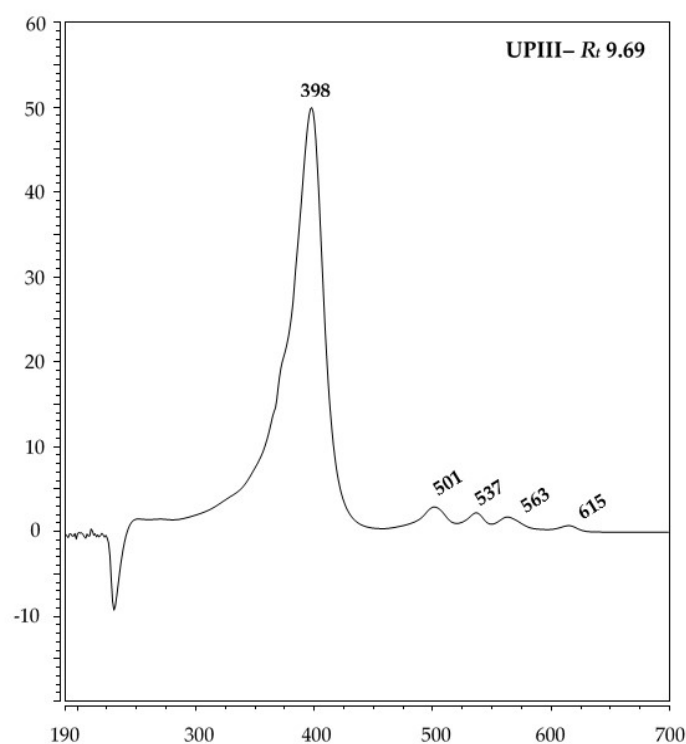

**Figure S2.** UV-vis spectra of authentic uroporphyrin III (UPIII).

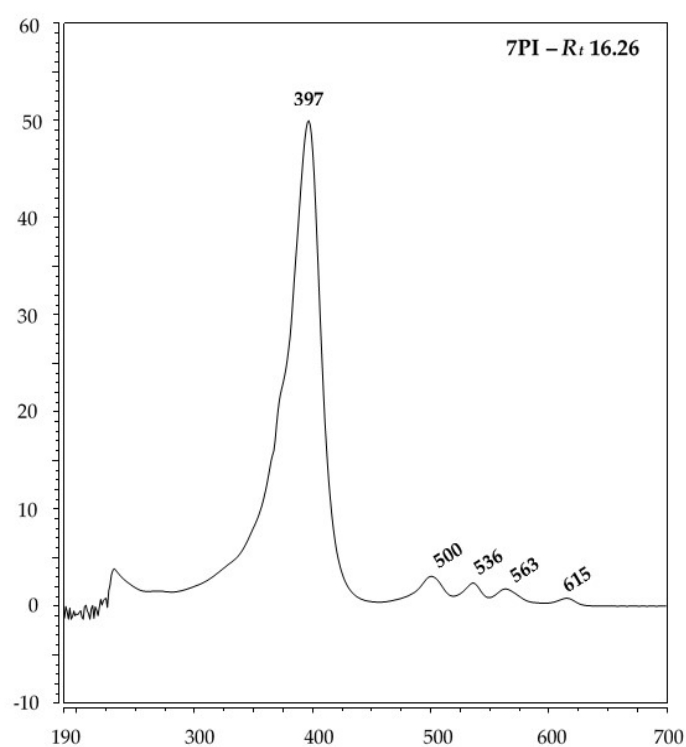

**Figure S3.** UV-vis spectra of authentic 7-carboxyl porphyrin (7PI).

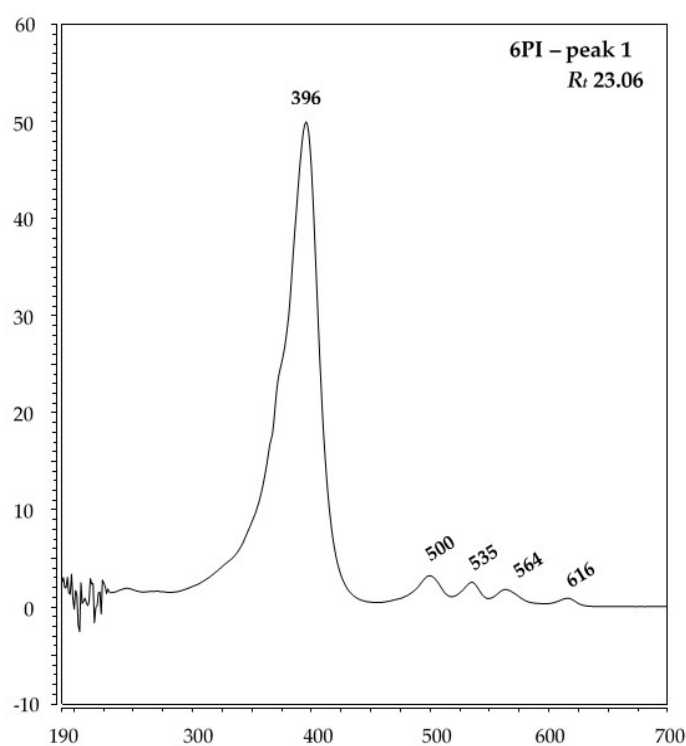

**Figure S4.** UV-vis spectra of authentic 6-carboxyl porphyrin (6PI) peak 1.

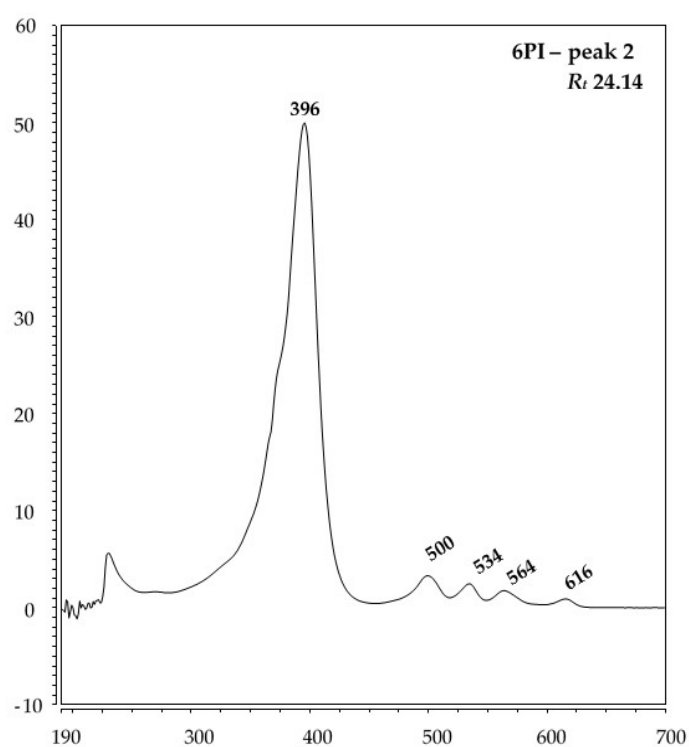

**Figure S5.** UV-vis spectra of authentic 6-carboxyl porphyrin (6PI) peak 2.

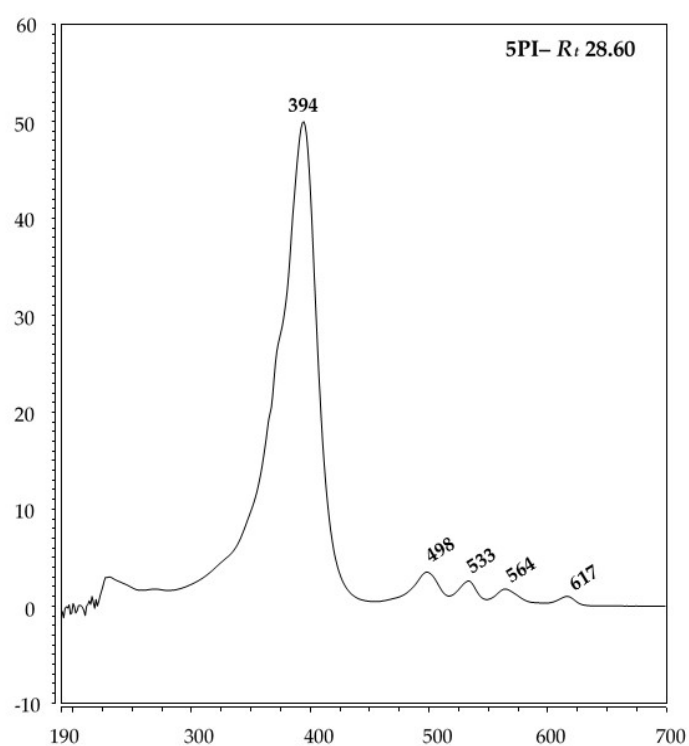

**Figure S6.** UV-vis spectra of authentic 5-carboxyl porphyrin (5PI).

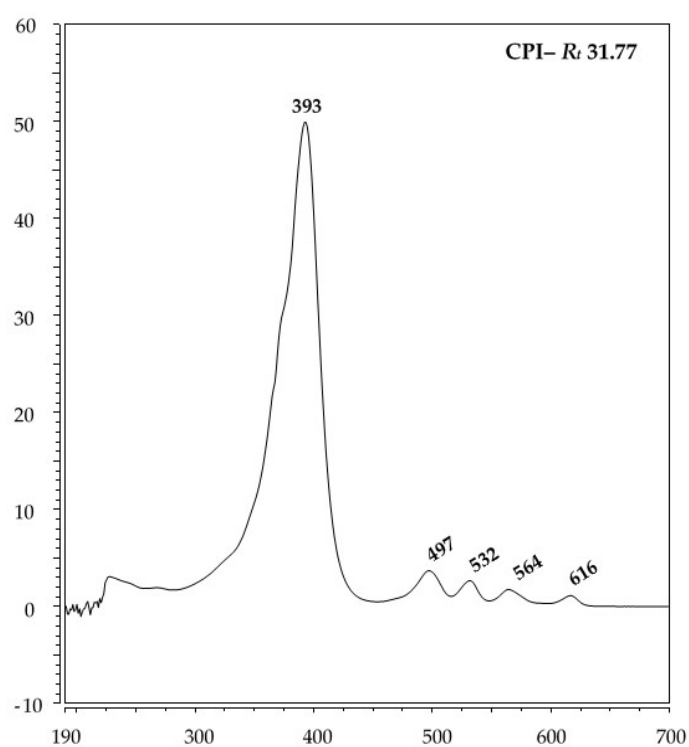

**Figure S7.** UV-vis spectra of authentic coproporphyrin I (CPI).

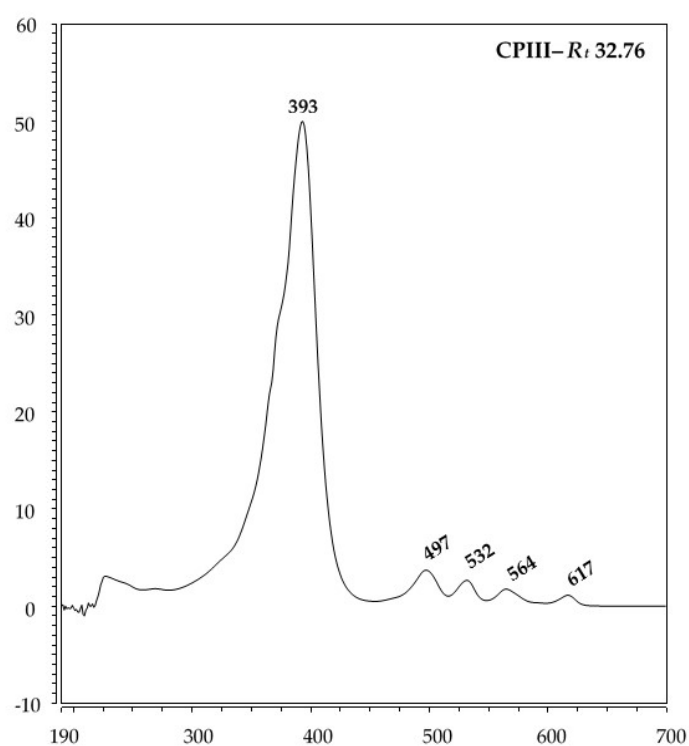

**Figure S8.** UV-vis spectra of authentic coproporphyrin III (CPiII).

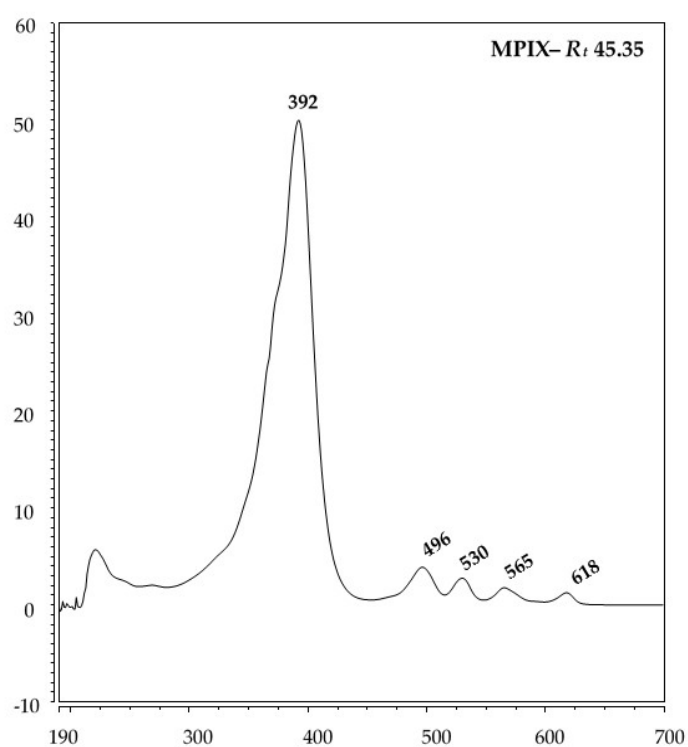

**Figure S9.** UV-vis spectra of authentic mesoporphyrin IX (MPIX).
